# Supplementary material for: Capping-agent-free synthesis of substrate-supported porous icosahedral gold nanoparticles
Source: Royal Society of Chemistry journal article supplement (doi:10.1039/c3nr34000g), 2013-01-01
Supplement: c3nr34000g.pdf [file c3nr34000g.pdf]

Cite this: DOI: 10.1039/c0xx00000x

www.rsc.org/Publishing/Journals/News/nanoscale.asp

**PAPER**

## Electronic Supplementary Information

### Capping-Agent-Free Synthesis of Substrate-Supported Porous Icosahedral Gold Nanoparticles

Ji Hong Wu,<sup>\*,a,b</sup> Zhenping Guan,<sup>b</sup> Su Ke Yang,<sup>a</sup> Peiyan Yuan,<sup>b</sup> Qing-Hua Xu,<sup>\*,b</sup> and Guo Qin Xu<sup>\*,b</sup>

Received (in XXX, XXX) Xth XXXXXXXXX 20XX, Accepted Xth XXXXXXXXX 20XX

DOI: 10.1039/b000000x

10

15

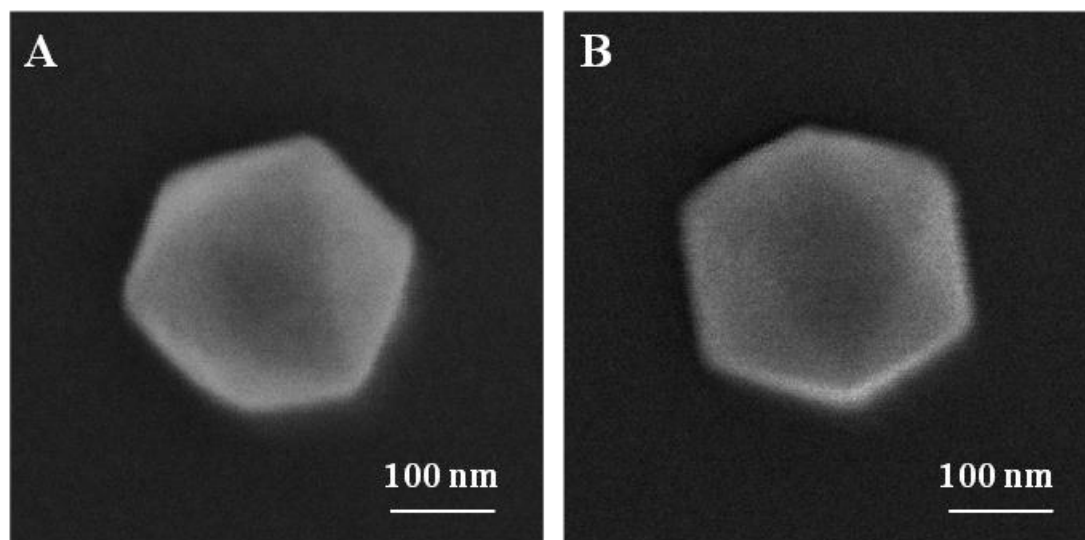

**Figure S1** SEM images of icosahedral Au(III) NPs before subjected to solid-phase thermolysis.

20
